# Supplementary material for: Nickel Nanoparticles Induced Hepatotoxicity in Mice via Lipid-Metabolism-Dysfunction-Regulated Inflammatory Injury
Source: MDPI journal article supplement (doi:10.3390/molecules28155757), 2023-07-30
Supplement: s1 [file s1]

## Supporting Materials

### Nickel Nanoparticles Induced Hepatotoxicity in Mice via Lipid

### Metabolism Dysfunction Regulated Inflammatory Injury

Shuang Zhou <sup>1,2</sup>, Hua Li <sup>1</sup>, Hui Wang <sup>1</sup>, Rui Wang <sup>1</sup>, Wei Song <sup>1</sup>, Da Li <sup>1</sup>, Changlei Wei <sup>1</sup>,  
Yu Guo <sup>1</sup>, Xueying He <sup>1,\*</sup> and Yulin Deng <sup>2,\*</sup>

<sup>1</sup> Beijing Institute of Medical Device Testing, Beijing Center for Testing and Research of Medical Biological Protective Equipment, Beijing 101111, China

<sup>2</sup> Beijing Institute of Technology, School of Life Science, Beijing 100081, China

\* Correspondence: hexueying@bimt.org.cn (X.H.); [deng@bit.edu.cn](mailto:deng@bit.edu.cn) (Y.D.)

**Table S1.** The primer sequences used in this work.

| Genes          | Forward primer sequences (5'-3') | Reverse primer sequences (5'-3') |
|----------------|----------------------------------|----------------------------------|
| <i>Tnf-α</i>   | ACCCTCACACTCAGATCATC             | GAGTAGACAAGGTACAACCC             |
| <i>Il-1β</i>   | CTTTGAAGTTGACGGACCC              | TGAGTGATACTGCCTGCCTG             |
| <i>Il-6</i>    | ACAAGTCGGAGGCTTAATTACACAT        | TTGCCATTGCACAACCTCTTTT           |
| <i>Ccl-2</i>   | CAGGTCCCTGTCATGCTTCT             | TCTGGACCCATTCTTCTTG              |
| <i>Ccl-3</i>   | TGTACCATGACACTCTGCAAC            | CAACGATGAATTGGCGTGGAA            |
| <i>Ccl-5</i>   | GCTGCTTTGCCTACCTCTCC             | TCGAGTGACAAACACGACTGC            |
| <i>Irelα</i>   | GAGCAAGCTAACGCCTACTCTGT          | CACCATTGAGGGAGAGGCATA            |
| <i>Perk</i>    | GGTATTTCAACGCCTGGCTG             | GGCCAGTCTGTGCTTTTCGTC            |
| <i>Atf6</i>    | GTTACTCACCCATCCGAGTTGT           | CAACGTCGACTCCCAGTCTTC            |
| <i>Bip</i>     | TGCGGCCAAGAACCAACTC              | AATGTCTTGTTTTGCCACCTC            |
| <i>Xbp1s</i>   | CAGCAAGTGGTGGATTTGGAAG           | TCTTAACCTCTGGTTCTCAACCACA        |
| <i>Atf4</i>    | CTGGCCGAGGCTATAAAGGG             | TGAAGAGCGCCATGGCTTAG             |
| <i>Chop</i>    | AATAACAGCCGGAACCTGAGGA           | ACTCAGCTGCCATGACTGCAC            |
| <i>Bax</i>     | CCCGAGAGGTCTTTTTCCGAG            | CCAGCCCATGATGGTTCTGAT            |
| <i>Bcl-2</i>   | CTGGCATCTTCTCCTTCCAG             | GACGGTAGCGACGAGAGAAG             |
| <i>Srebp1c</i> | GGAGCCATGGATTGCACATT             | GGCCCGGGAAGTCACTGT               |

---

|              |                       |                         |
|--------------|-----------------------|-------------------------|
| <i>Fasn</i>  | AGGTGGTGATAGCCGGTATGT | TGGGTAATCCATAGAGCCCAG   |
| <i>Scdl</i>  | GCGATACTCTGGTGCTCA    | CCCAGGGAAACCAGGATATT    |
| <i>Ppara</i> | AGAGCCCCATCTGTCCTCTC  | ACTGGTAGTCTGCAAAACCAAA  |
| <i>Gadph</i> | AGGTCGGTGTGAACGGATTTG | TGTAGACCATGTAGTTGAGGTCA |

---
